# Supplementary material for: Hdac7 promotes lung tumorigenesis by inhibiting Stat3 activation
Source: PubMed Central journal article supplement (PMC5681774; doi:10.1186/s12943-017-0736-2), 2017-11-10

## Supplementary Figure S1

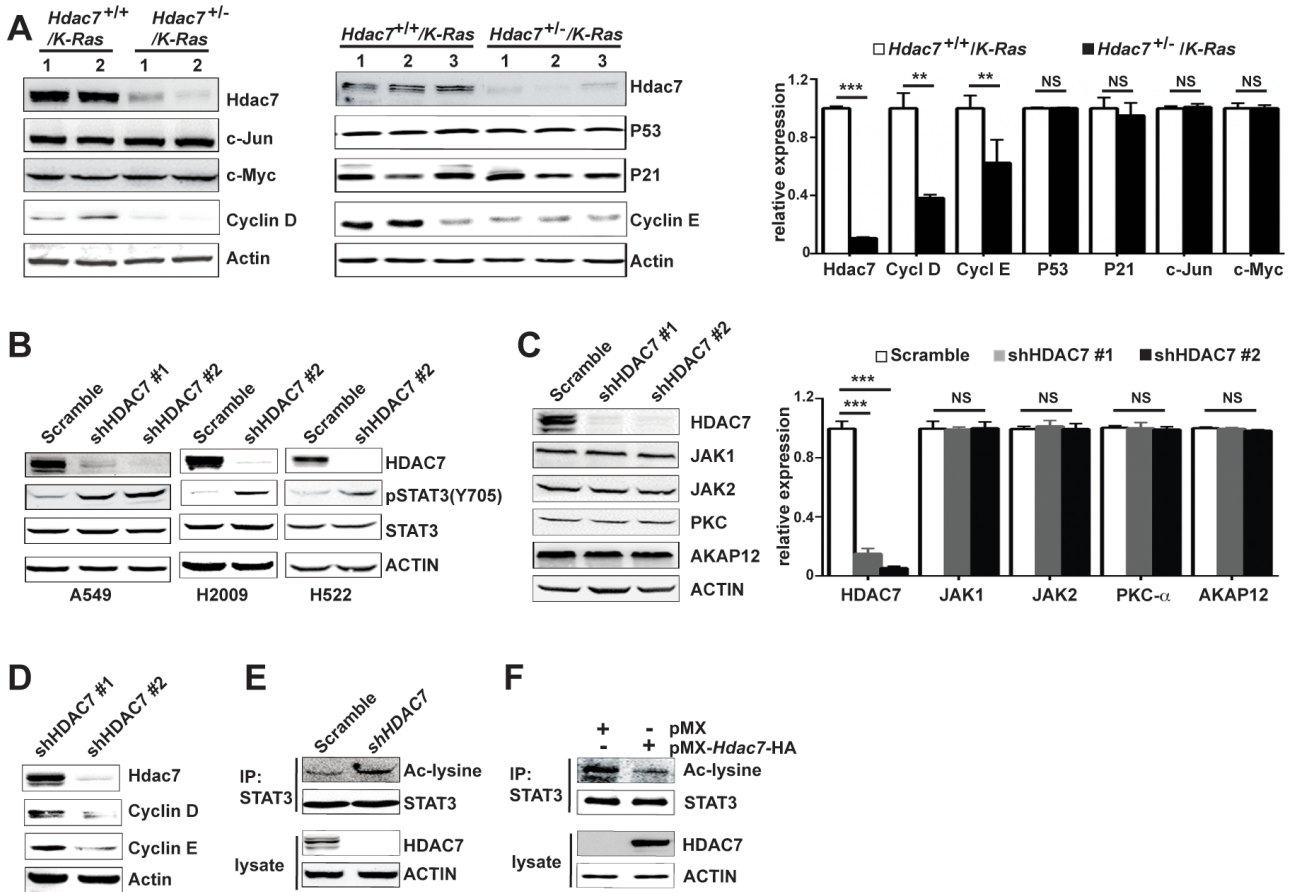

Supplement: 12943_2017_736_MOESM1_ESM.pdf [file 12943_2017_736_MOESM1_ESM.pdf]
